# Supplementary material
Source: PubMed Central journal article supplement (PMC4174954)
Supplement: 10d8c850723c33afca6a3f15ce925033_genetics.114.165886-5.pdf [file 10d8c850723c33afca6a3f15ce925033_genetics.114.165886-5.pdf]

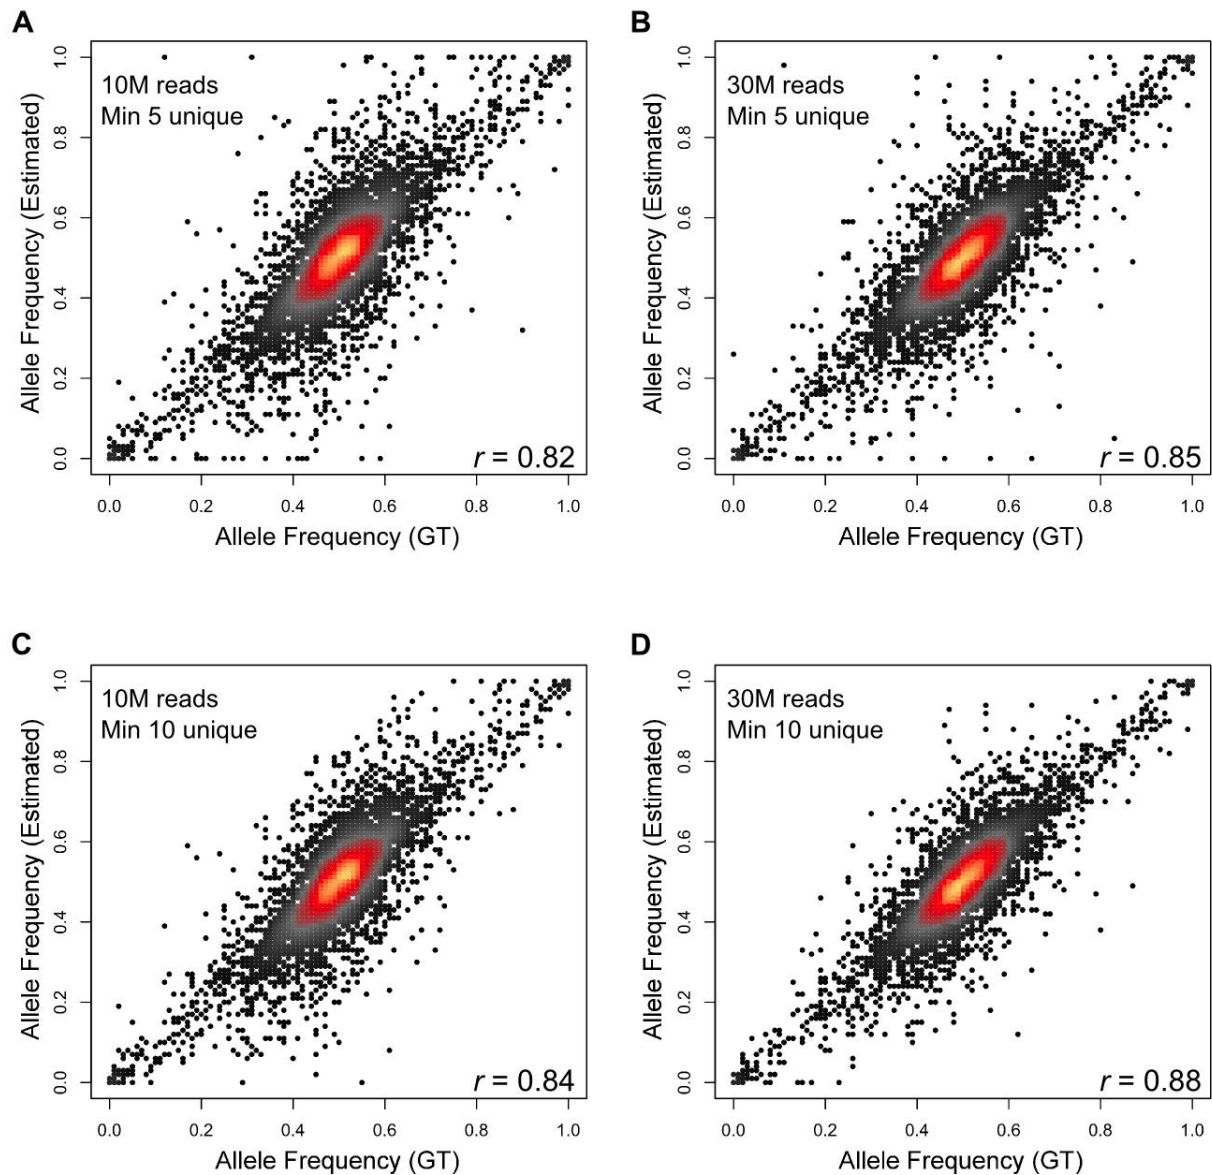

**Figure S1** Characterization of sequencing depth and unique read threshold on estimation of allele-specific expression. Estimated allele frequency (y-axis) is plotted in panels A-D against the ground truth allele frequency (x-axis) for robustly expressed genes (sum of allele counts  $\geq 100$ ) in the simulated DO dataset. Allele frequency estimates are improved by increasing the read depth from 10 million (panels A and C) to 30 million reads (panels B and D) and by increasing the gene inclusion stringency to require ten (panels C and D) rather than five (panels A and B) reads with unique allele alignments.
