# Supplementary material
Source: PubMed Central journal article supplement (PMC4174954)
Supplement: 27b923b43fd09ad2d7d79043f8cd4789_genetics.114.165886-11.pdf [file 27b923b43fd09ad2d7d79043f8cd4789_genetics.114.165886-11.pdf]

**Table S5 Comparison of gene-level abundance results from alignment of 30 million simulated DO reads to NCBI37 and individualized DO transcriptomes**

| Aligned to          | Mismatches Allowed | Genes above threshold | Number of genes with estimates x% from Ground Truth |              |             |       |
|---------------------|--------------------|-----------------------|-----------------------------------------------------|--------------|-------------|-------|
|                     |                    |                       | < 5%                                                | < 10%        | > 10%       | > 50% |
| <b>30M DO Reads</b> |                    |                       |                                                     |              |             |       |
| NCBI37              | 3                  | 13,260                | 7,371                                               | 10,995 (83%) | 2,265 (17%) | 355   |
| DO IRG              | 3                  | 13,209                | 9,829                                               | 11,696 (89%) | 1,501 (11%) | 262   |
| NCBI37              | 0                  | 13,222                | 2,301                                               | 4,800 (36%)  | 8,422 (64%) | 728   |
| DO IRG              | 0                  | 13,196                | 9,136                                               | 11,169 (85%) | 2,012 (15%) | 249   |

Gene estimates in the simulated DO sample are improved by read alignment to the individualized transcriptome ( $\leq 3$  mismatches), yielding 33% more gene estimates ( $N = +2,458$ ) within 5% of the ground truth value and 34% fewer estimates ( $N = -764$ ) that deviate more than 10% from the ground truth. Gene-level abundance results for perfect matching reads (i.e. 0 mismatches) are also shown.
