# Supplementary material
Source: PubMed Central journal article supplement (PMC4174954)
Supplement: 040fb52a9be59b27aa26b476132c4610_genetics.114.165886-15.pdf [file 040fb52a9be59b27aa26b476132c4610_genetics.114.165886-15.pdf]

**Table S1 Isoform-level summary of read alignment in the simulated CAST data**

|                           |                        | <b>Aligned to CAST</b>        |                             |                       |                           |                             |              |
|---------------------------|------------------------|-------------------------------|-----------------------------|-----------------------|---------------------------|-----------------------------|--------------|
| <b>Read Class</b>         |                        | <b>Incorrect Unique Reads</b> | <b>Incorrect Multireads</b> | <b>Unmapped Reads</b> | <b>Correct Multireads</b> | <b>Correct Unique Reads</b> | <b>Total</b> |
| <b>Aligned to NCBIM37</b> | Incorrect Unique Reads | 1,378                         | 1                           | 4                     | 11,721                    | 2,725                       | 15,829       |
|                           | Incorrect Multireads   | 3                             | 5,842                       | 2                     | 8,713                     | 492                         | 15,052       |
|                           | Unmapped Reads         | 48                            | 52                          | 1,709,356             | 191,919                   | 222,222                     | 2,123,597    |
|                           | Correct Multireads     | 15                            | 62                          | 145                   | 4,378,338                 | 10,739                      | 4,389,299    |
|                           | Correct Unique Reads   | 1                             | 2                           | 150                   | 5,075                     | 3,450,918                   | 3,456,146    |
|                           | <b>Total</b>           | 1,445                         | 5,959                       | 1,709,657             | 4,595,766                 | 3,687,096                   | 9,999,923    |

The simulated reads were aligned to the NCBIM37 and CAST transcriptomes. Reads that improve by alignment to CAST are highlighted in green, with those that improve by two or more categories are highlighted in dark green. Reads that improve by alignment to NCBIM37 are highlighted in red, with those that improve by two or more categories highlighted in dark red. Reads on the diagonal align equivalently by both strategies.
