# Supplementary material
Source: PubMed Central journal article supplement (PMC4174954)
Supplement: 91d14414eb7e1686619561984979ef0b_genetics.114.165886-8.pdf [file 91d14414eb7e1686619561984979ef0b_genetics.114.165886-8.pdf]

**Table S7 eQTL simulation summary showing the classification of eQTL calls that differ between alignment strategies differentiated by gene biotype**

| Gene Biotype           | Correct Calls |              |              | Incorrect Calls |                      |                        |
|------------------------|---------------|--------------|--------------|-----------------|----------------------|------------------------|
|                        | True Local    | True Distant | True No eQTL | False Negative  | False Positive Local | False Positive Distant |
| Antisense              | 2             | 3            | 15           | -2              | -16                  | -2                     |
| IG_C_gene              | 0             | 0            | 1            | 0               | -1                   | 0                      |
| lincRNA                | 6             | 3            | 15           | -7              | -15                  | -2                     |
| misc_RNA               | 2             | 0            | 2            | -2              | -1                   | -1                     |
| Mt_rRNA                | 0             | 0            | 0            | 0               | 0                    | 0                      |
| non_coding             | 0             | 0            | 0            | 0               | 0                    | 0                      |
| polymorphic pseudogene | 1             | 0            | 0            | -1              | 0                    | 0                      |
| processed_transcript   | 3             | 0            | 2            | -3              | -2                   | 0                      |
| protein_coding         | 336           | 94           | 981          | -353            | -980                 | -78                    |
| pseudogene             | 23            | 3            | 32           | -10             | -7                   | -41                    |
| retrotransposed        | 3             | -1           | 1            | -2              | 1                    | -2                     |
| sense_intronic         | 0             | 0            | 1            | 0               | -1                   | 0                      |
| sense_overlapping      | 0             | 0            | 0            | 0               | 0                    | 0                      |
| snoRNA                 | 0             | 0            | 0            | 0               | 0                    | 0                      |
| <b>Total</b>           | <b>376</b>    | <b>102</b>   | <b>1050</b>  | <b>-380</b>     | <b>-1022</b>         | <b>-126</b>            |

Choice of read alignment strategy affects ten percent of genes ( $n = 1,528/15,027$  total) in our simulation study. Alignment to individualized DO transcriptomes yields the correct eQTL assignment for all but one gene with a discordant call. Many gene biotypes yield incorrect eQTL calls after alignment to GRCh38 but pseudogenes in particular appear to be sensitive to false positive distant associations.
