# Supplementary material
Source: PubMed Central journal article supplement (PMC4174954)
Supplement: 244b8f3ed9423b714dd6c466cf4dcf3a_genetics.114.165886-14.pdf [file 244b8f3ed9423b714dd6c466cf4dcf3a_genetics.114.165886-14.pdf]

**Table S3 Comparison of gene-level abundance results from alignment of 30 million simulated CAST reads to NCBIM37 and CAST transcriptomes**

| Aligned to            | Mismatches Allowed | Genes above threshold | Number of genes with estimates x% from Ground Truth |              |              |       |
|-----------------------|--------------------|-----------------------|-----------------------------------------------------|--------------|--------------|-------|
|                       |                    |                       | < 5%                                                | < 10%        | > 10%        | > 50% |
| <b>30M CAST Reads</b> |                    |                       |                                                     |              |              |       |
| NCBIM37               | 3                  | 13,848                | 3,701                                               | 7,850 (57%)  | 5,998 (43%)  | 654   |
| CAST                  | 3                  | 13,756                | 10,040                                              | 11,939 (87%) | 1,794 (13%)  | 272   |
| NCBIM37               | 0                  | 13,788                | 1,535                                               | 3,127 (23%)  | 10,661 (77%) | 2,082 |
| CAST                  | 0                  | 13,738                | 9,322                                               | 11,325 (82%) | 2,386 (18%)  | 259   |

Alignment of 30 million simulated CAST reads to the individualized CAST transcriptome ( $\leq 3$  mismatches) results in nearly three times as many gene estimates ( $N = +6,339$ ) that fall within 5% of ground truth value and fewer than a third as many gene estimates ( $N = -4,204$ ) that deviate more than 10% from the ground truth. Gene-level abundance results for perfect matching reads (i.e. 0 mismatches) are also shown.
