# Supplementary material
Source: PubMed Central journal article supplement (PMC4174954)
Supplement: 989e410b79d20bfd96c40977d57fa36b_genetics.114.165886-10.pdf [file 989e410b79d20bfd96c40977d57fa36b_genetics.114.165886-10.pdf]

**Table S12 Comparison of isoform abundance results in CAST simulation study from using paired-end or single-end sequencing**

30 Million Simulated CAST Reads

| PE/SE?     | Aligned to | Mismatches Allowed | Isoforms above threshold | Number of isoforms with estimates x% from Ground Truth |                |                |                |
|------------|------------|--------------------|--------------------------|--------------------------------------------------------|----------------|----------------|----------------|
|            |            |                    |                          | < 5%                                                   | < 10%          | > 10%          | > 50%          |
| Paired-End | CAST       | 3                  | 26,735                   | 9,988 (37.4%)                                          | 11,977 (44.8%) | 14,758 (55.2%) | 7,497 (28.0%)  |
| Single-End | CAST       | 3                  | 28,331                   | 8,911 (31.5%)                                          | 10,895 (38.5%) | 17,436 (61.5%) | 10,266 (36.2%) |

Paired-end sequencing yields modest improvements in isoform abundance estimation relative to single-end reads. For example, 45% of isoform estimates fall within ten percent of the simulated ground truth value in the analysis of paired-end reads, compared to 39% for single-end reads.
