# Supplementary material
Source: PubMed Central journal article supplement (PMC4174954)
Supplement: bb57dfac1578fc8656b17d4d54f0bcaa_genetics.114.165886-19.pdf [file bb57dfac1578fc8656b17d4d54f0bcaa_genetics.114.165886-19.pdf]

Table S6 Alignment statistics for real CAST and DO liver RNA-seq data

| Liver Sample                                               | CAST/EiJ Male     | DO Male                  |
|------------------------------------------------------------|-------------------|--------------------------|
| <b>Total Reads</b>                                         | 11,795,344        | 15,637,635               |
| <b>Reads with valid alignments (<math>\leq 3</math>MM)</b> |                   |                          |
| Alignment to NCBI37/Ensembl.v67 transcripts                | 8,832,341 (74.9%) | 12,906,790 (82.5%)       |
| Alignment to strain/sample-specific transcripts            | 9,085,246 (77.0%) | 13,058,015 (83.5%)       |
| Difference (Individualized - NCBI37)                       | +252,905 (2.1%)   | +151,225 (1.0%)          |
| <b>Reads with perfect matches (0MM)</b>                    |                   |                          |
| Alignment to NCBI37/Ensembl.v67 transcripts                | 4,201,180 (35.6%) | 7,645,880 (48.9%)        |
| Alignment to strain/sample-specific transcripts            | 5,183,409 (43.9%) | 8,350,402 (53.4%)        |
| Difference (Individualized - NCBI37)                       | +982,229 (8.3%)   | +704,522 (4.5%)          |
| <b>Total valid alignments to the transcriptome</b>         |                   |                          |
| Alignment to NCBI37/Ensembl.v67 transcripts                | 45,607,883        | 106,584,022 <sup>1</sup> |
| Alignment to strain/sample-specific transcripts            | 46,131,288        | 103,687,674              |
| Difference (Individualized - NCBI37)                       | +523,405          | -2,896,348               |

Bowtie (version 0.12.8) parameters: -v 3 -a -m --best --strata

<sup>1</sup> For comparison to the diploid transcriptome alignments in DO samples, the total number of alignments to NCBI37 were scaled by 2x.

Alignment of real data to individualized CAST- or DO-specific transcriptomes yields more reads with valid alignments ( $\leq 3$  mismatches (MM)), and significantly more reads with perfect (0 MM) alignments. Reads align with greater specificity (i.e. fewer alignments per mapped read) to individualized transcriptomes than to NCBI37.
