# Supplementary material
Source: PubMed Central journal article supplement (PMC4174954)
Supplement: c01a62dd747e230de83343d74dab1ef5_genetics.114.165886-1.pdf [file c01a62dd747e230de83343d74dab1ef5_genetics.114.165886-1.pdf]

**Table S11 Isoform abundance results in CAST simulation study**

10 Million Simulated CAST reads

| <b>Aligned to</b> | <b>Mismatches Allowed</b> | <b>Isoforms above threshold</b> | <b>Number of isoforms with estimates x% from Ground Truth</b> |                 |                 |                 |
|-------------------|---------------------------|---------------------------------|---------------------------------------------------------------|-----------------|-----------------|-----------------|
|                   |                           |                                 | <b>&lt; 5%</b>                                                | <b>&lt; 10%</b> | <b>&gt; 10%</b> | <b>&gt; 50%</b> |
| NCBIM37           | 3                         | 21,568                          | 3,908                                                         | 6,581 (30%)     | 14,987 (70%)    | 7,096           |
| CAST              | 3                         | 21,457                          | 3,244                                                         | 7,796 (36%)     | 13,661 (64%)    | 6,551           |
| NCBIM37           | 0                         | 21,363                          | 1,393                                                         | 2,883 (13%)     | 18,480 (87%)    | 9,488           |
| CAST              | 0                         | 21,222                          | 1,998                                                         | 5,089 (24%)     | 16,133 (76%)    | 6,540           |

30 Million Simulated CAST reads

| <b>Aligned to</b> | <b>Mismatches Allowed</b> | <b>Isoforms above threshold</b> | <b>Number of isoforms with estimates x% from Ground Truth</b> |                 |                 |                 |
|-------------------|---------------------------|---------------------------------|---------------------------------------------------------------|-----------------|-----------------|-----------------|
|                   |                           |                                 | <b>&lt; 5%</b>                                                | <b>&lt; 10%</b> | <b>&gt; 10%</b> | <b>&gt; 50%</b> |
| NCBIM37           | 3                         | 27,048                          | 3,600                                                         | 7,217 (27%)     | 19,831 (73%)    | 9,821           |
| CAST              | 3                         | 26,910                          | 6,685                                                         | 9,951 (37%)     | 16,959 (63%)    | 9,031           |
| NCBIM37           | 0                         | 26,909                          | 1,765                                                         | 3,454 (13%)     | 23,455 (87%)    | 12,748          |
| CAST              | 0                         | 26,695                          | 6,792                                                         | 9,578 (36%)     | 17,013 (64%)    | 8,821           |

Alignment of simulated CAST reads to the individualized CAST transcriptome ( $\leq 3$  mismatches) improves estimates of isoform abundance compared to alignment to NCBIM37. Increasing the sequencing depth from 10 to 30 million single-end reads significantly does not improve isoform resolution – more isoform estimates fall within five percent of the simulated ground truth but the total number of isoforms expressed above threshold increases too, causing no relative improvement in the accuracy of isoform abundance estimates. Isoform-level abundance results for perfect matching reads (i.e. 0 mismatches) are also shown.
