# Supplementary material
Source: PubMed Central journal article supplement (PMC4174954)
Supplement: c75cc94894279eda94fc3aebc811ea7b_genetics.114.165886-7.pdf [file c75cc94894279eda94fc3aebc811ea7b_genetics.114.165886-7.pdf]

## File S1

### Supplemental Methods

#### **Simulation parameters**

RNA-seq reads were simulated from the CAST inbred strain and from a reconstructed DO individual using the Flux Simulator (version 1.2) and the parameters below.

Command line argument: flux-simulator -lsp Parameter\_filename.txt

#### Single-end sequence parameters

|                   |                              |
|-------------------|------------------------------|
| REF_FILE_NAME     | path/to/Gene_annotations.gtf |
| GEN_DIR           | path/to/Genome.fa            |
| LIB_FILE_NAME     | filename.lib                 |
| SEQ_FILE_NAME     | filename.bed                 |
| PRO_FILE_NAME     | filename.pro                 |
| RT_PRIMER         | PDT                          |
| READ_NUMBER       | 10000000 (or 30000000)       |
| READ_LENGTH       | 100                          |
| FILTERING         | true                         |
| SIZE_DISTRIBUTION | N(280,50)                    |
| FASTA             | true                         |
| TSS_MEAN          | NaN                          |
| POLYA_SCALE       | NaN                          |
| POLYA_SHAPE       | NaN                          |
| ERR_FILE          | 76                           |

#### Paired-end sequence parameters

|                   |                              |
|-------------------|------------------------------|
| REF_FILE_NAME     | path/to/Gene_annotations.gtf |
| GEN_DIR           | path/to/Genome.fa            |
| LIB_FILE_NAME     | filename.lib                 |
| SEQ_FILE_NAME     | filename.bed                 |
| PRO_FILE_NAME     | filename.pro                 |
| RT_PRIMER         | PDT                          |
| READ_NUMBER       | 60000000                     |
| READ_LENGTH       | 100                          |
| PAIRED_END        | YES                          |
| FILTERING         | true                         |
| SIZE_DISTRIBUTION | N(280,50)                    |
| FASTA             | true                         |
| TSS_MEAN          | NaN                          |
| POLYA_SCALE       | NaN                          |
| POLYA_SHAPE       | NaN                          |
| ERR_FILE          | 76                           |
