# Supplementary material
Source: PubMed Central journal article supplement (PMC4174954)
Supplement: dca6e2a045a4f1e356e65caffac3657f_genetics.114.165886-12.pdf [file dca6e2a045a4f1e356e65caffac3657f_genetics.114.165886-12.pdf]

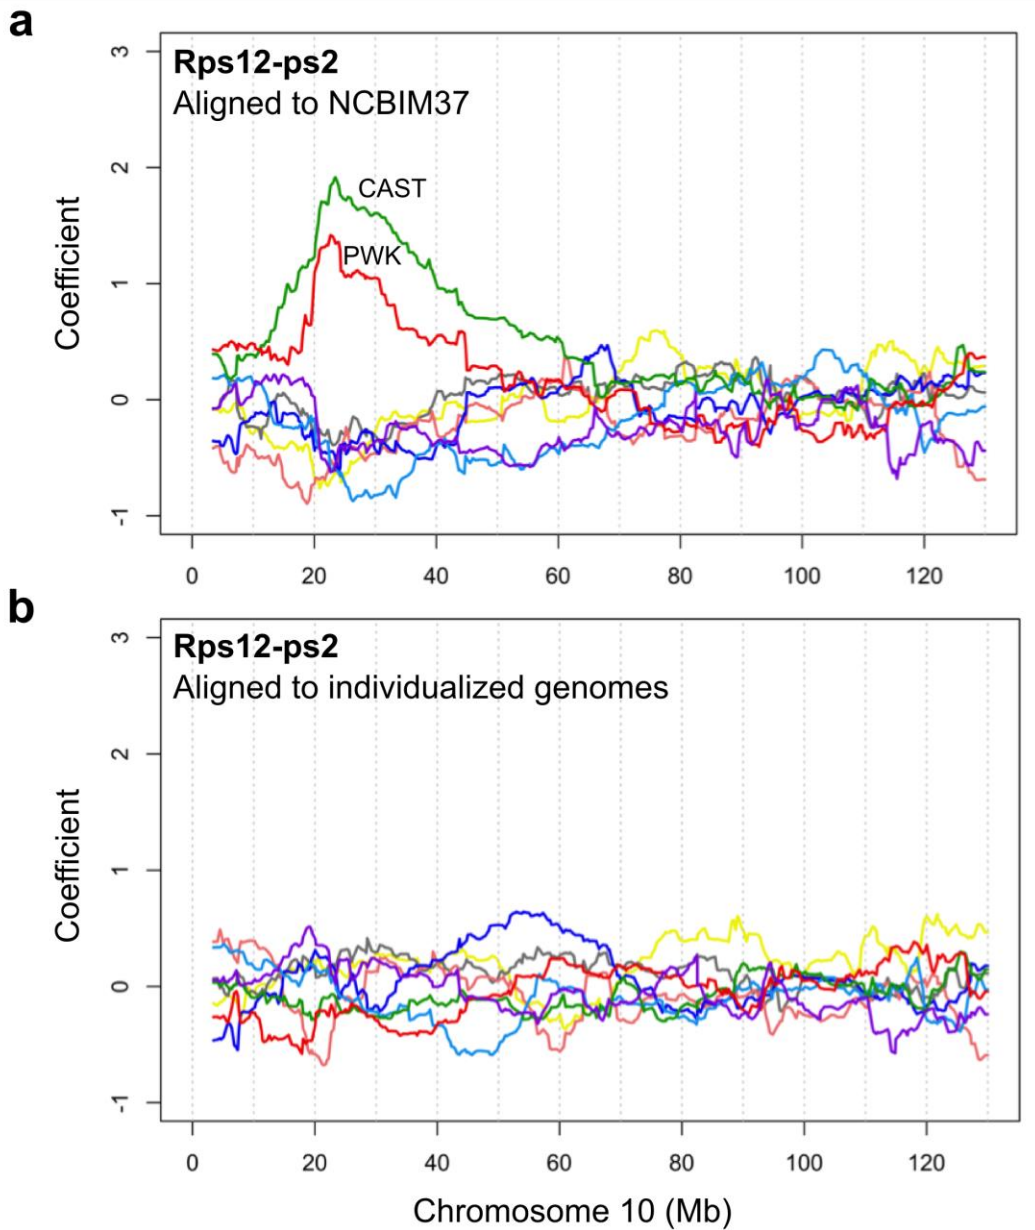

**Figure S2** Comparison of Chromosome 10 founder coefficient plots for *Rps12-ps2* expression derived from alignment to NCBIM37 or individualized DO transcriptomes. Read alignment to individualized DO transcriptomes ameliorates spurious alignments to pseudogenes. When DO reads are aligned to the NCBIM37 reference transcriptome (A), it appears that DO animals that derive the Chr 10 region from CAST or PWK have higher expression of the pseudogene *Rps12-ps2*. When individual genetic variation is accounted for in the alignment (B), the CAST- and PWK-derived reads align preferentially to the parent protein coding gene *Rps12*, and the spurious *Rps12-ps2* eQTL is eliminated.
